# Supplementary material for: Evaluation of cyrhetrenyl and ferrocenyl precursors as 5-lipoxygenase inhibitors – biological and computational studies
Source: Royal Society of Chemistry journal article supplement (doi:10.1039/d1nj01336j), 2021-01-01
Supplement: d1nj01336j1.pdf [file d1nj01336j1.pdf]

**Electronic Supporting Information (ESI) for New Journal of Chemistry 2021:**

**Evaluation of cyrhetrenyl and ferrocenyl precursors as 5-lipoxygenase inhibitors. Biological and computational studies.**

Michelle Muñoz-Osses<sup>a</sup>, Javiera Quiroz<sup>b</sup>, Yesseny Vásquez-Martínez<sup>c</sup>, Erick Flores<sup>a</sup>, Elizabeth Navarrete<sup>b</sup>, Fernando Godoy<sup>a</sup>, Claudia Torrent<sup>b</sup>, Marcelo Cortez-San Martín<sup>d</sup>, Alejandra Gómez<sup>a\*</sup>, Carolina Mascayano<sup>b\*</sup>

---

<sup>a</sup>Departamento Química de los Materiales, Universidad de Santiago de Chile, Chile.

<sup>b</sup>Departamento Ciencias del Ambiente, Universidad de Santiago de Chile, Chile.

<sup>c</sup>Programa Centro de Investigaciones Biomédicas y Aplicadas (CIBAP), Escuela de Medicina, Facultad de Ciencias Médicas, Universidad de Santiago de Chile, Chile.

<sup>d</sup>Departamento Biología, Universidad de Santiago de Chile, Chile.

---

## Index

### Experimental Section:

1. Characterization of organometallic precursors (Figure S1-S9)
2. Biological studies (Figure S10-S11; Table S1)
3. Antioxidant activity (Figure S12)

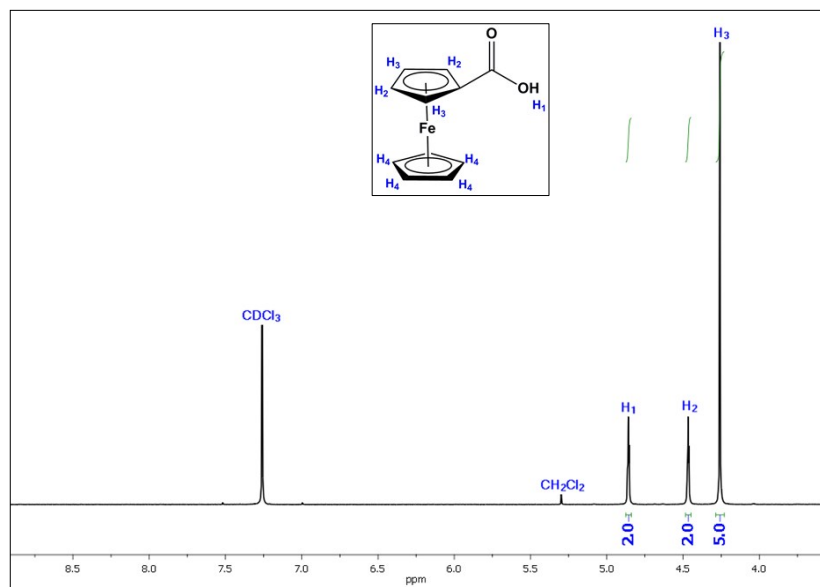

**Figure S1.**  $^1\text{H-NMR}$  of **1c** in  $\text{CDCl}_3$ .

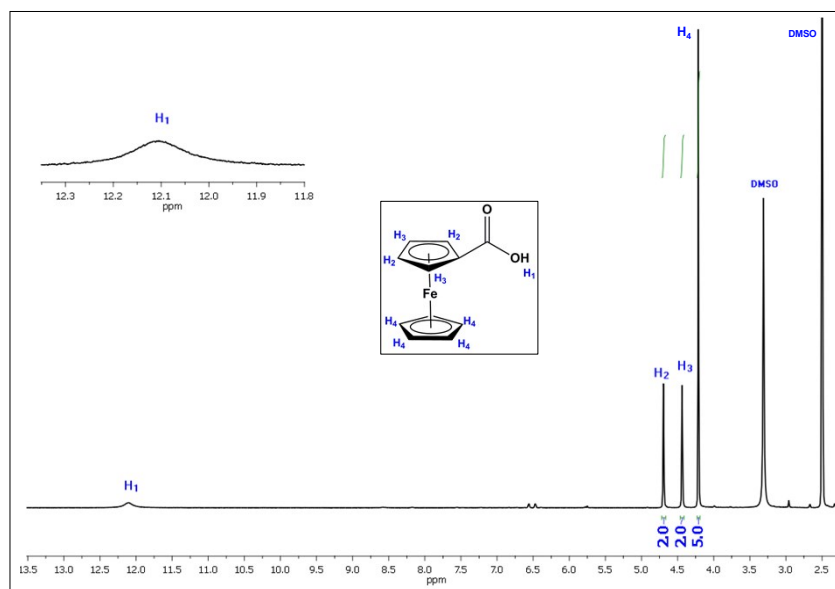

**Figure S2.**  $^1\text{H-NMR}$  of **1c** in  $\text{DMSO-d}_6$ .

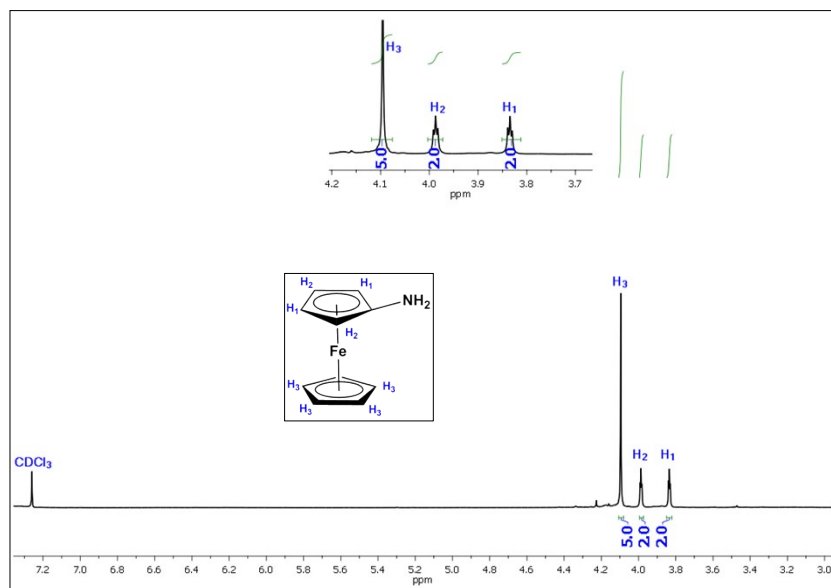

Figure S3.  $^1\text{H-NMR}$  of **1d** in  $\text{CDCl}_3$ .

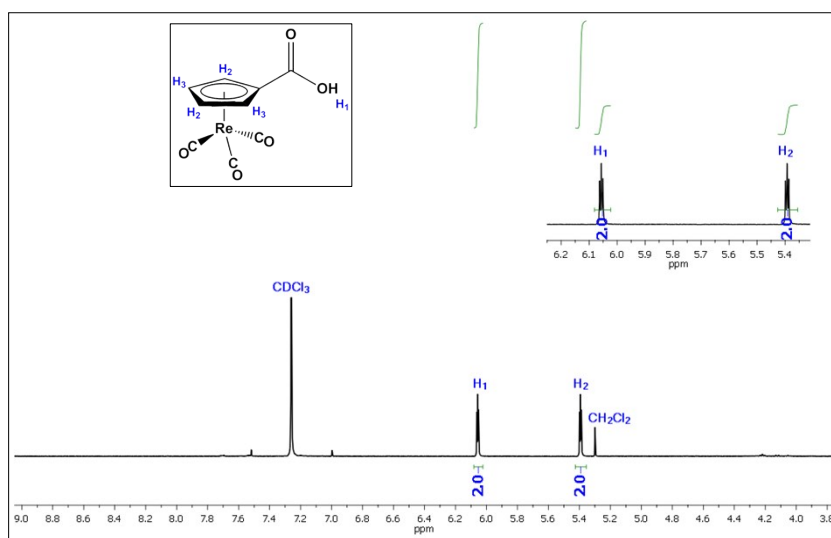

Figure S4.  $^1\text{H-NMR}$  of **2c** in  $\text{CDCl}_3$ .

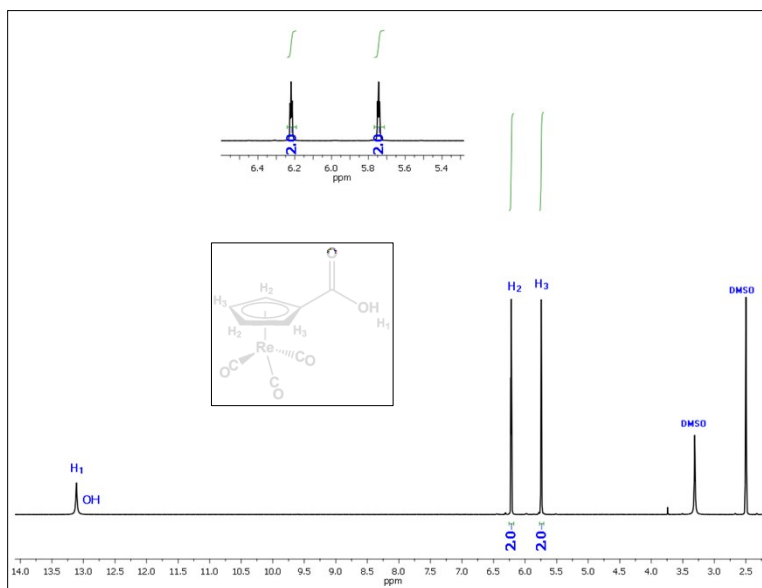

Figure S5.  $^1\text{H-NMR}$  of **2c**  $\text{DMSO-d}_6$ .

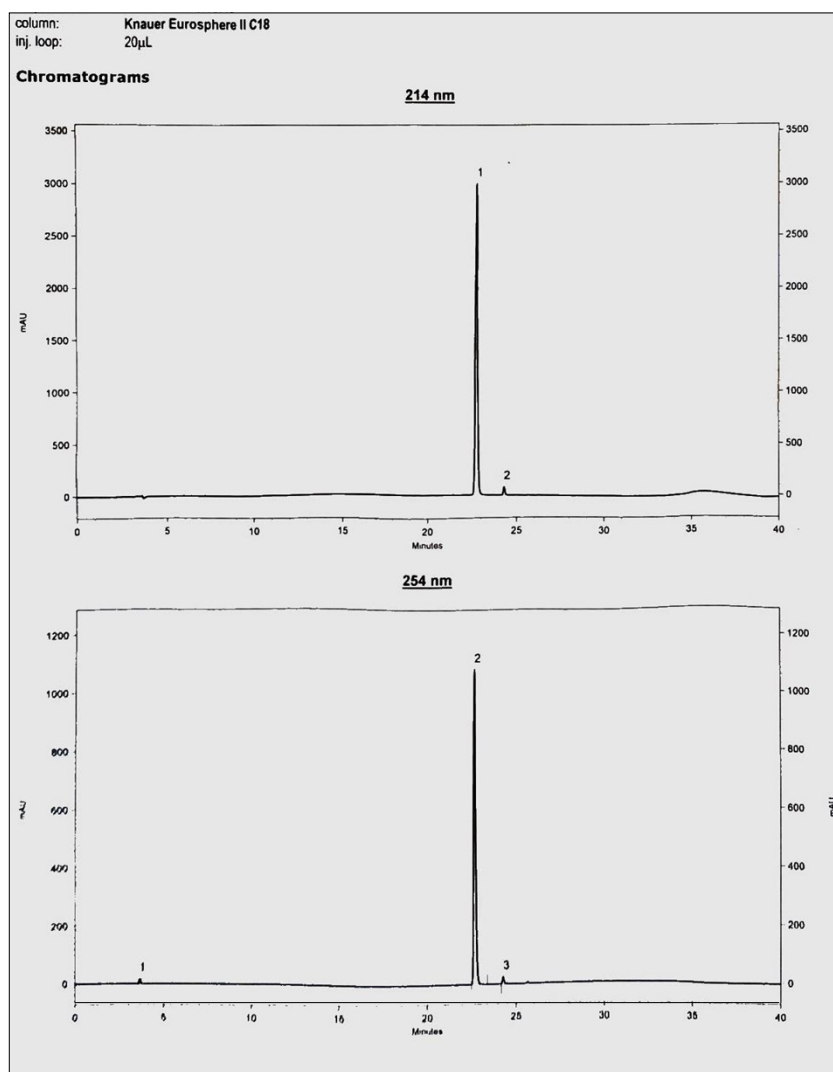

| <b>Integration Table</b>                     |                |          |        |
|----------------------------------------------|----------------|----------|--------|
| UV-Detektor S<br>2550 [Channel<br>1] Results |                |          |        |
| Pk #                                         | Retention Time | Area     | Area % |
| 1                                            | 22,717         | 24240191 | 97,95  |
| 2                                            | 24,283         | 506903   | 2,05   |
| <b>Totals</b>                                |                | 24747094 | 100,00 |
| UV-Detektor S<br>2550 [Channel<br>2] Results |                |          |        |
| Pk #                                         | Retention Time | Area     | Area % |
| 1                                            | 3,617          | 61894    | 0,73   |
| 2                                            | 22,683         | 8290719  | 97,51  |
| 3                                            | 24,267         | 149953   | 1,76   |
| <b>Totals</b>                                |                | 8502566  | 100,00 |

**Figure S6.** HPLC (H<sub>2</sub>O:CH<sub>3</sub>CN) of **2c**. Retention time: 22.68 minutes (254nm), 97% purity.

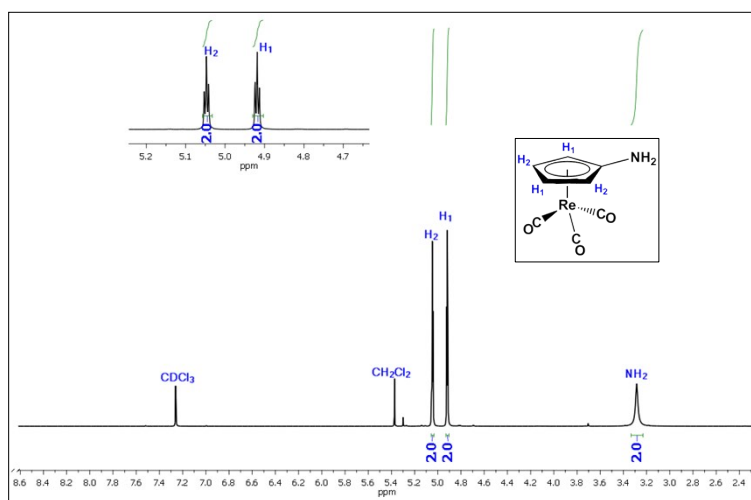

**Figure S7.** <sup>1</sup>H-NMR of **2d** in CDCl<sub>3</sub>.

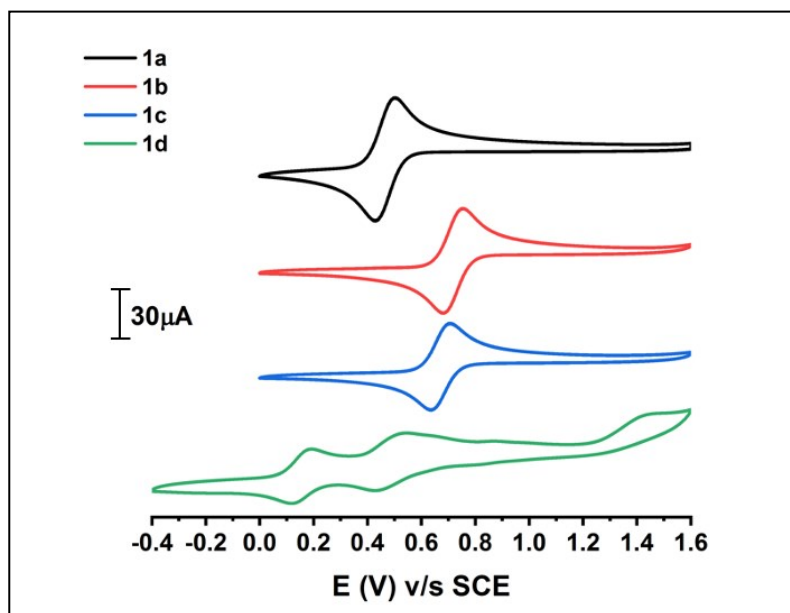

**Figure S8.** Cyclic voltammety of ferrocenyl derivatives **1a-d** (1 mM) in dry CH<sub>3</sub>CN using (Bu<sub>4</sub>N)[PF<sub>6</sub>] (0.1 M) as the supporting electrolyte.

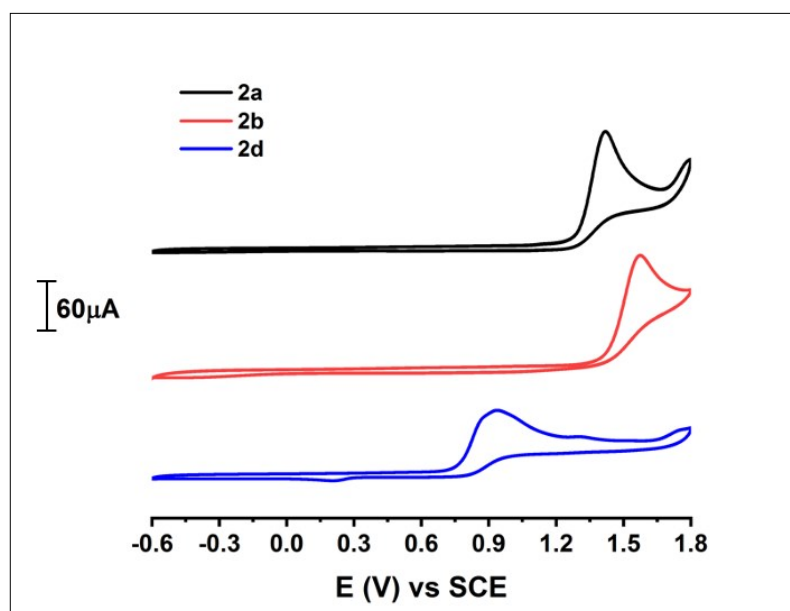

**Figure S9.** Cyclic voltammety of cyrhetrenyl complexes **2a,b,d** (1 mM) in dry CH<sub>3</sub>CN using (Bu<sub>4</sub>N)[PF<sub>6</sub>] (0.1 M) as the supporting electrolyte.

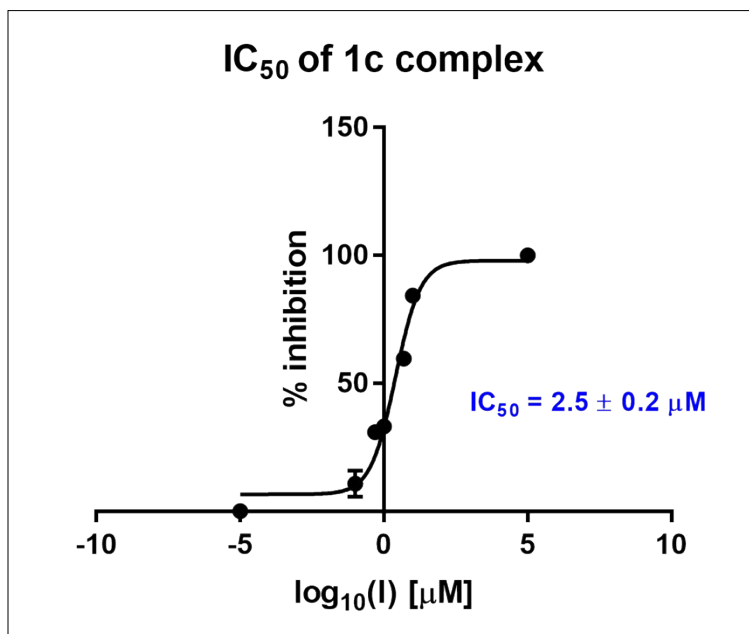

**Figure S10.** IC<sub>50</sub> (μM) of ferrocenyl carboxylic acid complex (**1c**) in 5-hLOX.

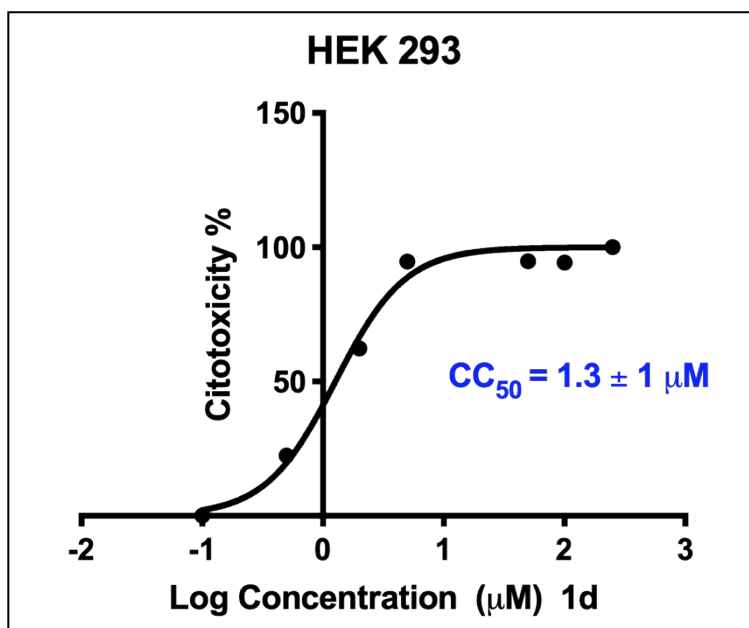

**Figure S11.** CC<sub>50</sub> (μM) of aminoferrocene complex (**1d**) in HEK293 cell.

**Table S1.** *In vitro* antibacterial assay. The expressed values are the percent inhibition of bacterial growth achieved by compounds at a concentration of 100 µg/mL and Minimum inhibitory concentration (MIC; µg/mL)

| Compounds | <i>S. aureus</i><br>ATCC 6538  | Compounds | <i>S. aureus</i><br>ATCC 6538  | Compounds                      | <i>S. aureus</i><br>ATCC 6538 |
|-----------|--------------------------------|-----------|--------------------------------|--------------------------------|-------------------------------|
| <b>1a</b> | 0<br>(>100 µg/mL)<br>> 537 µM  | <b>1c</b> | 6<br>(>100 µg/mL)<br>> 434 µM  | <b>*Ciprofloxacin</b><br>(MIC) | 100<br>(2 µg/mL)<br>6.03 µM   |
| <b>2a</b> | 23<br>(>100 µg/mL)<br>> 298 µM | <b>2c</b> | 37<br>(>100 µg/mL)<br>> 264 µM | <b>*Vancomycin</b><br>(MIC)    | 100<br>(5 µg/mL)<br>3.45 µM   |
| <b>1b</b> | 16<br>(>100 µg/mL)<br>> 467 µM | <b>1d</b> | 40<br>(>100 µg/mL)<br>> 498 µM | <b>*Meticillin</b><br>(MIC)    | 100<br>(5 µg/mL)<br>13.14 µM  |
| <b>2b</b> | 38<br>(>100 µg/mL)<br>> 275 µM | <b>2d</b> | 35<br>(>100 µg/mL)<br>> 286 µM | <b>*Ampicillin</b><br>(MIC)    | -                             |

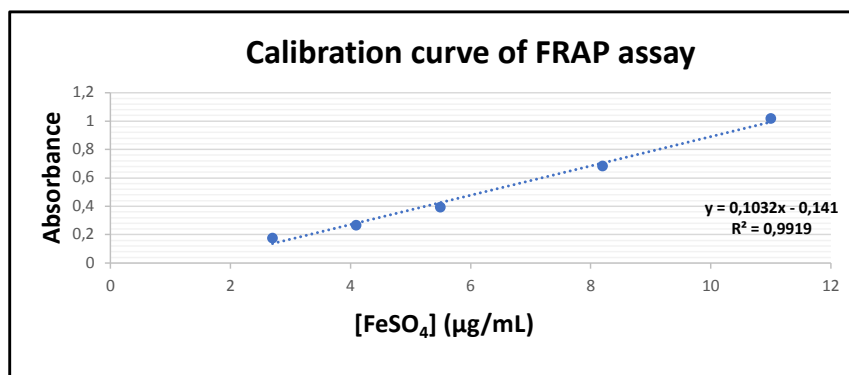

**Figure S12.** Calibration curve for the FRAP assay.
